# Supplementary material
Source: PubMed Central journal article supplement (PMC4368043)
Supplement: cn500297v_si_001.pdf [file cn500297v_si_001.pdf]

## SUPPORTING INFORMATION

### **Benzodiazepinone Derivatives Protect Against Endoplasmic Reticulum (ER) Stress-mediated Cell Death in Human Neuronal Cell Lines<sup>†</sup>**

#### **Authors**

Haixia Zou,<sup>1</sup> Allison S. Limpert,<sup>1</sup> Jiwen Zou,<sup>2</sup> Anna Dembo,<sup>1</sup> Pooi-San Lee,<sup>1</sup> Daniel Grant,<sup>1</sup> Robert Ardecky,<sup>2</sup> Anthony B. Pinkerton,<sup>2</sup> Gavin K. Magnuson,<sup>2</sup> Mark E. Goldman,<sup>1</sup> Juan Rong,<sup>1</sup> Douglas J. Sheffler,<sup>1</sup> John C. Reed,<sup>1</sup> and Nicholas D. P. Cosford<sup>1,2\*</sup>

#### **Author Information:**

<sup>1</sup>Cell Death and Survival Networks Research Program, NCI-Designated Cancer Center, Sanford-Burnham Medical Research Institute, 10901 North Torrey Pines Road, La Jolla, CA 92037, USA

<sup>2</sup>Conrad Prebys Center for Chemical Genomics, Sanford-Burnham Medical Research Institute, 10901 North Torrey Pines Road, La Jolla, CA 92037, USA.

\*Corresponding Author: [ncosford@sanfordburnham.org](mailto:ncosford@sanfordburnham.org).

<sup>†</sup>This paper is dedicated to our departed colleague Professor Gregory P. Roth.

**Supplemental Table S1**

| Target             | % Inhibition @ 10 $\mu$ M 4hh | K <sub>i</sub> (nM) |
|--------------------|-------------------------------|---------------------|
| 5-HT1A             | 22                            |                     |
| 5-HT1B             | 6                             |                     |
| 5-HT1D             | 25                            |                     |
| 5-HT1E             | 5                             |                     |
| 5-HT2A             | -10                           |                     |
| 5-HT2B             | 50                            |                     |
| 5-HT2C             | 5                             |                     |
| 5-HT3              | -5                            |                     |
| 5-HT5A             | 85                            | 7,961               |
| 5-HT6              | 30                            |                     |
| 5-HT7              | 4                             |                     |
| Alpha1A            | 17                            |                     |
| Alpha1B            | -5                            |                     |
| Alpha1D            | 8                             |                     |
| Alpha2A            | 5                             |                     |
| Alpha2B            | -8                            |                     |
| Beta1              | -1                            |                     |
| Beta2              | 1                             |                     |
| Beta3              | 0                             |                     |
| BZP Rat Brain Site | 22                            |                     |
| Calcium Channel    | 24                            |                     |
| D1                 | -6                            |                     |
| D2                 | 99                            | >10,000             |
| D3                 | 12                            | >10,000             |
| D4                 | 100                           | 1,530               |
| D5                 | 37                            |                     |
| DAT                | 69                            | >10,000             |
| DOR                | 12                            |                     |
| EP3                | 12                            |                     |
| EP4                | 7                             |                     |
| GABAA              | 36                            |                     |
| H1                 | 40                            |                     |
| H2                 | 38                            |                     |
| H3                 | 43                            |                     |
| H4                 | 12                            |                     |
| KOR                | 10                            |                     |
| M1                 | -4                            |                     |
| M2                 | -1                            |                     |
| M3                 | 43                            |                     |
| M4                 | -1                            |                     |
| M5                 | 20                            |                     |
| MOR                | 9                             |                     |
| NET                | 51                            | 4,864               |
| SERT               | 57                            | >10,000             |
| Sigma 1            | 6                             |                     |
| Sigma 2            | 12                            |                     |

**Supplemental Table 1. PDSP off-target binding data for 4hh.**
